# Supplementary material for: Ag2S–AgInS2: p–n junction heteronanostructures with quasi type-II band alignment
Source: Royal Society of Chemistry journal article supplement (doi:10.1039/c3cc48903e), 2013-12-24
Supplement: c3cc48903e.pdf [file c3cc48903e.pdf]

## Supporting Information

### **Ag<sub>2</sub>S-AgInS<sub>2</sub>: p-n junction heteronanostructures with quasi Type-II band alignment**

*Riya Bose\*, Goutam Manna, Santanu Jana and Narayan Pradhan\**

Centre for Advanced Materials and Department of Materials Science, Indian Association for  
the Cultivation of Science, Kolkata- 700032, India

## Experimental Section

### *Materials*

Silver (I) acetate ( $\text{Ag}(\text{OAc})$ , 99.99%), Indium (III) acetate ( $\text{In}(\text{OAc})_3$ , 99.99%), Sulfur (S powder), Oleylamine (OAm, tech.), Octadecene (ODE, tech.) were purchased from Aldrich. All the chemicals were used without further purification.

### *Synthesis of $\text{AgInS}_2$ - $\text{Ag}_2\text{S}$ heterostructures*

In a typical synthesis, 0.1 mmol  $\text{In}(\text{OAc})_3$  (0.032 g) was taken in a three necked flask along with 5 mL oleylamine (OAm) and 1 mL ODE. The mixture was degassed by purging argon for 10 min. Then the temperature was increased to 200 °C to dissolve  $\text{In}(\text{OAc})_3$ . Once a clear solution was obtained, the temperature was cooled down to room temperature and 0.1 mmol  $\text{Ag}(\text{OAc})$  (0.016 g) was added into the flask. Then it was again degassed by purging argon for 10 min. After degassing, the temperature was increased to 180 °C and annealed for 10 min. Then 0.25 mmol S powder (0.008 g) dissolved in 0.5 mL ODE was injected into the flask and the temperature was increased to 210 °C. At that temperature, it was annealed for another 10 min. Then the temperature was cooled down and samples were collected.

### *Purification*

The as synthesized nanocrystals were precipitated using excess acetone from the crude product and further purified using chloroform as solvent and acetone as non-solvent. The purified nanocrystals were dispersed in chloroform for further measurements.

## Instrumentation

*Optical measurements:* Agilent-8453 UV-vis spectrophotometer and Varian-cary-5000 UV-vis-NIR were used for UV-vis and NIR measurement respectively.

*Transmission electron microscopy (TEM):* TEM images were taken with a JEOL-JEM 2010 electron microscope using 200 kV electron source and a UHR-FEG-TEM, JEOL; JEM 2100

F model using 200kV electron source. Specimens were prepared by dropping a drop of nanocrystal solution in chloroform on a carbon coated copper grid, and the grid was dried in air. TEM images on STEM (HAADF) mode were taken in the UHR-FEG-TEM.

*Scanning tunneling microscopy (STM) and scanning tunneling spectroscopy (STS):* For STM & STS studies, the dilute solution of sample in chloroform was deposited by drop cast technique on freshly cleaved HOPG substrate by means of mechanical exfoliation. After drying the sample in an oven, it was further heated at  $\sim 150$  °C for 30 min inside the glovebox to deplete the ligands on the surface. FTIR spectra of the sample before and after annealing have been provided in Figure S7. After that, it was immediately inserted into the load lock chamber of the STM (Omicron UHV STM). After overnight pumping of the load lock chamber, the sample was inserted into the main STM chamber. All STM measurements were carried out at  $2 \times 10^{-10}$  Torr pressure. The bias voltage and set current during scanning were 2V and 0.5 nA respectively.

*X-ray diffraction (XRD):* XRD of the samples were taken by Bruker D8 Advance powder diffractometer, using Cu K $\alpha$  ( $\lambda = 1.54$  Å) as the incident radiation.

*Device fabrication for photovoltaic measurement:* For device fabrication, ITO coated glass substrate was cleaned by detergent, de-ionized water, acetone, methanol and finally with 2-propanol. In each step, the substrate in the cleaning solution was sonicated in an ultrasonic bath for 15 min. Finally the substrate was dried in vacuum oven at temperature of 120 °C. At first, a 15 nm PEDOT:PSS (Baytron P 4083) layer was spun on ITO substrate at a speed of 5000 rpm. PEDOT:PSS film was annealed at 150 °C for 15 min on a hot plate. Then a chloroform solution of the purified AgInS<sub>2</sub>-Ag<sub>2</sub>S heterostructures with concentration of 20 mg/mL was spin coated on the substrate at a speed of 2000 rpm for 60s. The film was then heated to 150 °C for 30 min to remove excess solvent and then cooled down to room temperature. Finally, a 100 nm film of Silver (Ag) as strip orthogonal to ITO electrodes was

thermally evaporated under vacuum ( $\sim 10^{-6}$  Torr). Overlap of ITO and Ag strips defined the area of the devices ( $4 \text{ mm}^2$ ). After silver evaporation, the devices were further annealed at  $150^\circ\text{C}$  for 20 min under inert atmosphere.

*Current-Voltage (I-V) measurement:* I-V characteristics under dark and illumination conditions were recorded with a Keithley 6517B Electrometer. The photocurrent was measured by illuminating the samples with white light of intensity  $100 \text{ mW/cm}^2$ . A 150 W Newport-Stratfort Solar Simulator model 76500, attached with an AM 1.5 filters, acted as the source for illumination.

### **Formation mechanism of $\text{AgInS}_2$ - $\text{Ag}_2\text{S}$ heterostructures:**

To understand the formation mechanism of the heterostructures, we analysed the TEM images of the intermediate samples collected during successive stages of the reaction. Figure S2(a-b) show the TEM images obtained from the sample collected after dissolution of  $\text{In}(\text{OAc})_3$  in (OAm+ODE) mixture and before addition of Ag which show  $\text{In}_2\text{O}_3$  agglomerated nanostructures. Formation of  $\text{In}_2\text{O}_3$  nanostructures under similar reaction conditions has already been reported in literature.<sup>1</sup> XRD of the sample also shows peaks corresponding to cubic  $\text{In}_2\text{O}_3$  (Figure S2c). Samples collected at 10 min after  $\text{Ag}(\text{OAc})$  addition and prior to S injection show formation of several larger size particles along with the unchanged  $\text{In}_2\text{O}_3$  agglomerated nanostructures (Figure S2(d-e)). Figure S2f shows the XRD pattern of this sample which shows peaks corresponding to cubic  $\text{Ag}(0)$  along with cubic  $\text{In}_2\text{O}_3$ . So the larger size particles are nothing but  $\text{Ag}(0)$  nanoparticles. Formation of  $\text{Ag}(0)$  nanoparticles is expected by reduction of  $\text{Ag}(\text{I})$  in presence of amine.<sup>2</sup> However, in the XRD of the final sample (Figure S1) no peak corresponding to  $\text{Ag}(0)$  is observed which rules out the presence of  $\text{Ag}(0)$  in the final nanostructures.

The formation of the heterostructures via  $\text{In}_2\text{O}_3$  and  $\text{Ag}(0)$  nanoparticles was further confirmed from the successive absorbance spectra obtained from stepwise collected samples (Figure S3a). After dissolution of  $\text{In}(\text{OAc})_3$  in OAm, the absorption band edge is obtained at  $\sim 390$  nm which matches well with the band gap of cubic  $\text{In}_2\text{O}_3$  ( $\sim 3$  eV),<sup>3</sup> whereas after  $\text{Ag}(\text{OAc})$  addition to the reaction mixture and annealing, an additional sharp absorbance peak was obtained at  $\sim 410$  nm. This is the typical absorbance for surface plasmonic resonance of  $\text{Ag}(0)$  which suggests that  $\text{Ag}(0)$  nanoparticles have been formed in the reaction medium.<sup>4</sup> Finally, after S injection, the  $\text{Ag}(0)$  surface plasmonic absorbance is completely diminished and the band edge shifts to  $\sim 670$  nm indicating formation of  $\text{AgInS}_2$ . This again rules out the presence of  $\text{Ag}(0)$  in the final nanostructures. The final sample also shows another absorption band edge in the near-IR region ( $\sim 1100$  nm) (Figure S3b) which originates due to the  $\text{Ag}_2\text{S}$  part.

So, after S injection to the reaction mixture containing  $\text{In}_2\text{O}_3$  agglomerated nanostructures and  $\text{Ag}(0)$  nanoparticles, these  $\text{AgInS}_2$ - $\text{Ag}_2\text{S}$  heterostructures are formed. As Ag has a higher affinity towards S, soon after addition of S,  $\text{Ag}_2\text{S}$  is formed first. We also confirmed this by injecting S-precursor to the solution containing only agglomerated  $\text{In}_2\text{O}_3$  nanostructures at the same temperature and annealing ( $\sim 180$  °C- $210$  °C), where  $\text{In}_2\text{S}_3$  formation was not observed. Ag-chalcogenides are known to be superior conductors where the high mobility of  $\text{Ag}^+$  promotes a lot of  $\text{Ag}^+$  vacancies in the nanocrystals. This high density of cation vacancies in turn promotes foreign cation incorporation.<sup>5</sup> Hence, once  $\text{Ag}_2\text{S}$  is formed in the reaction medium,  $\text{In}^{3+}$  ions diffuse into it to form  $\text{AgInS}_2$  species, which in turn is pushed out from  $\text{Ag}_2\text{S}$  and locates on a suitable lattice plane of  $\text{Ag}_2\text{S}$  with minimized lattice mismatch. So  $\text{Ag}_2\text{S}$  acts here as catalyst to form  $\text{AgInS}_2$  by acting as a host for  $\text{In}^{3+}$  ions as well as serves as the source material for formation of  $\text{AgInS}_2$ .<sup>5a</sup>

## Supporting Figures

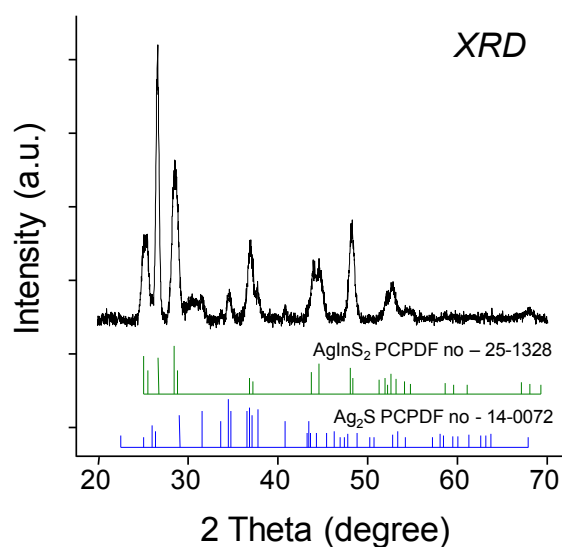

**Fig. S1.** XRD of AgInS<sub>2</sub>-Ag<sub>2</sub>S heterostructures which shows peaks corresponding to orthorhombic AgInS<sub>2</sub> and monoclinic Ag<sub>2</sub>S.

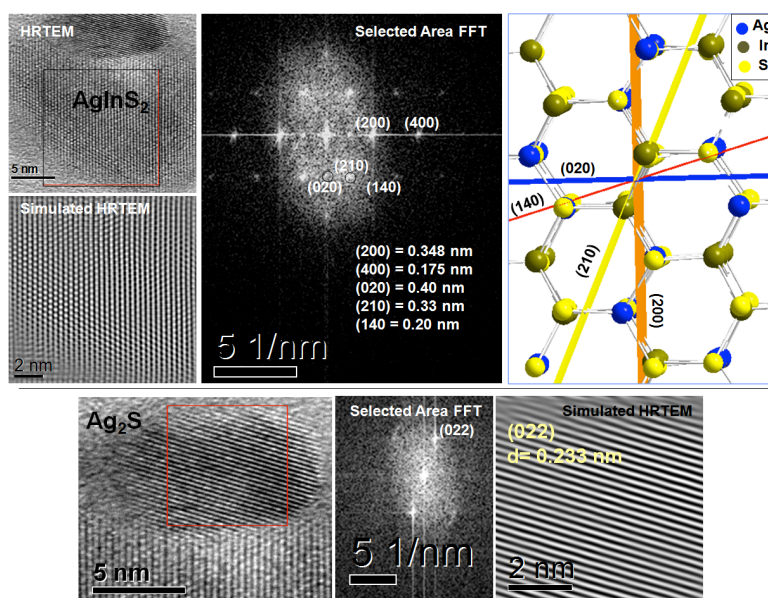

**Fig. S2.** Upper Panel: HRTEM image, Simulated HRTEM, Selected area FFT pattern and correlated atomic model of AgInS<sub>2</sub> part of the heterostructure. Bottom Panel: HRTEM image, FFT and simulated HRTEM of Ag<sub>2</sub>S part of the heterostructures. The planes are marked for both cases and these are self-explanatory.

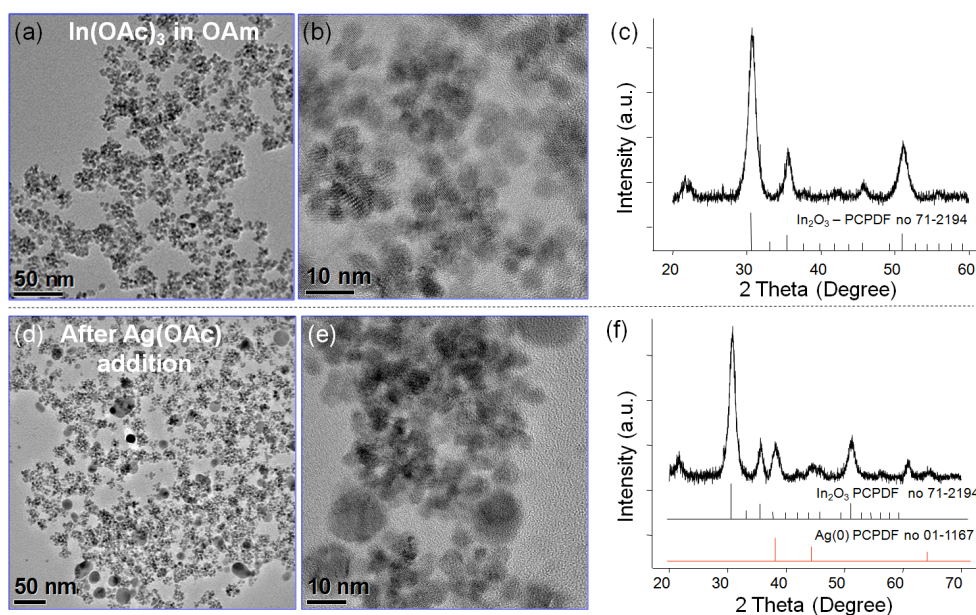

**Fig. S3.** (a-b) TEM and HRTEM image of the sample collected after dissolution of  $\text{In}(\text{OAc})_3$  in (OAm+ODE) and before addition of  $\text{Ag}(\text{OAc})$ , which show formation of agglomerated  $\text{In}_2\text{O}_3$  nanostructures. (c) XRD of the same which shows peaks corresponding to cubic  $\text{In}_2\text{O}_3$ . (d-e) TEM and HRTEM image of the sample collected after  $\text{Ag}(\text{OAc})$  addition to the reaction mixture and annealing for 10 min. Large  $\text{Ag}(0)$  nanoparticles are observed along with  $\text{In}_2\text{O}_3$  nanostructures. (f) XRD of the sample which shows peaks corresponding to cubic  $\text{In}_2\text{O}_3$  and cubic  $\text{Ag}(0)$ .

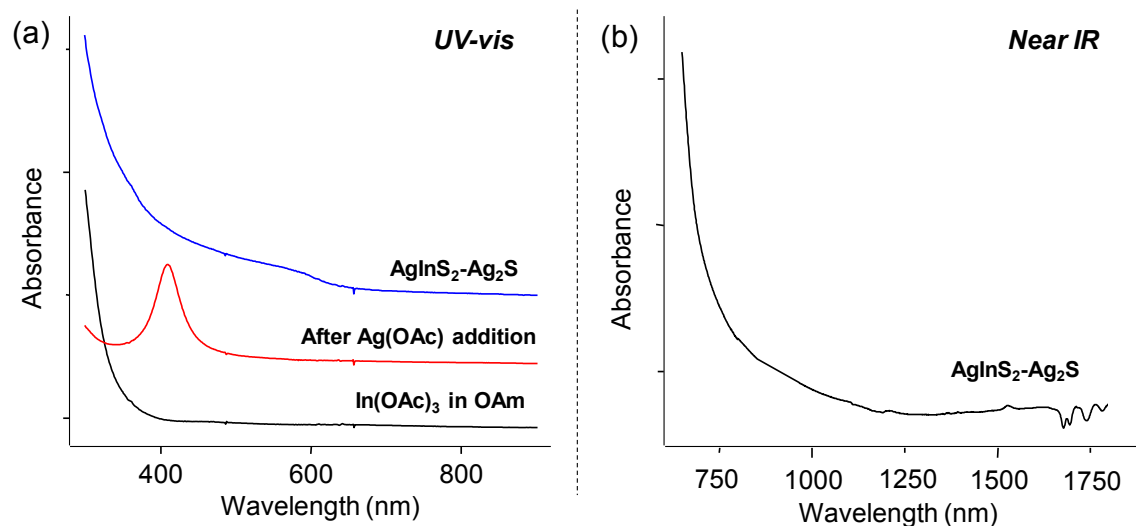

**Fig. S4.** (a) Successive UV-vis absorbance spectra during the formation of AgInS<sub>2</sub>-Ag<sub>2</sub>S heterostructure. (b) Absorbance spectrum of the heterostructures in near-IR region which shows absorption bandedge at (~1100 nm) originating due to the Ag<sub>2</sub>S part.

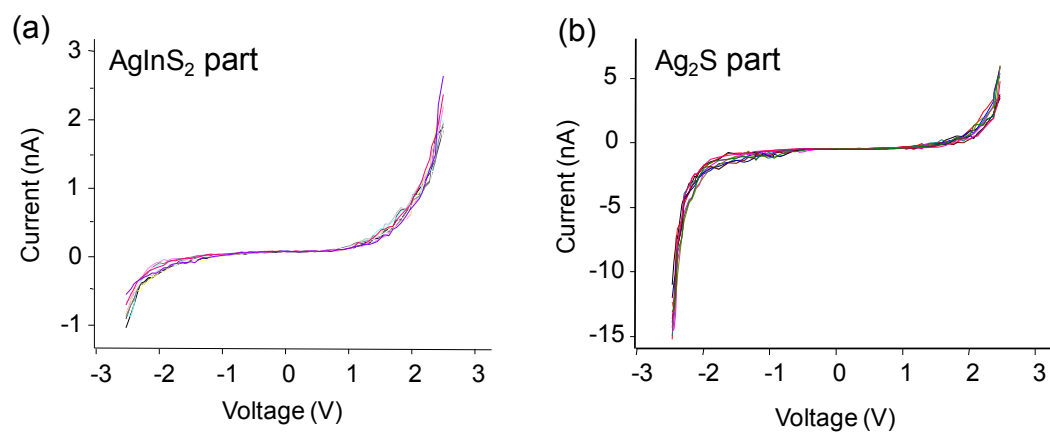

**Fig. S5.** Current vs voltage plot obtained from scanning tunnelling spectroscopy measurement by placing the STM tip over AgInS<sub>2</sub> part (a) and Ag<sub>2</sub>S part (b) respectively.



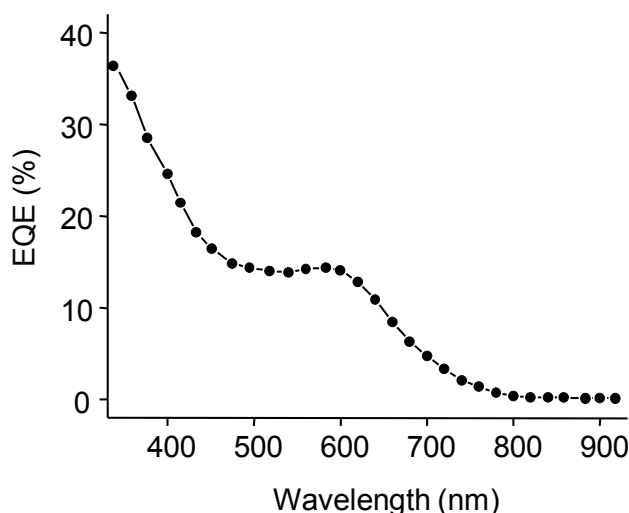

**Fig. S6.** External quantum efficiency (EQE) spectrum of ITO/PEDOT:PSS/Ag<sub>2</sub>S-AgInS<sub>2</sub>/Ag device under white light illumination. The spectrum shows its maxima at ~600 nm and it matches quite well with the absorbance spectra of the heterostructures. It is also observed that the response of the device is higher in the visible region than in the NIR region.

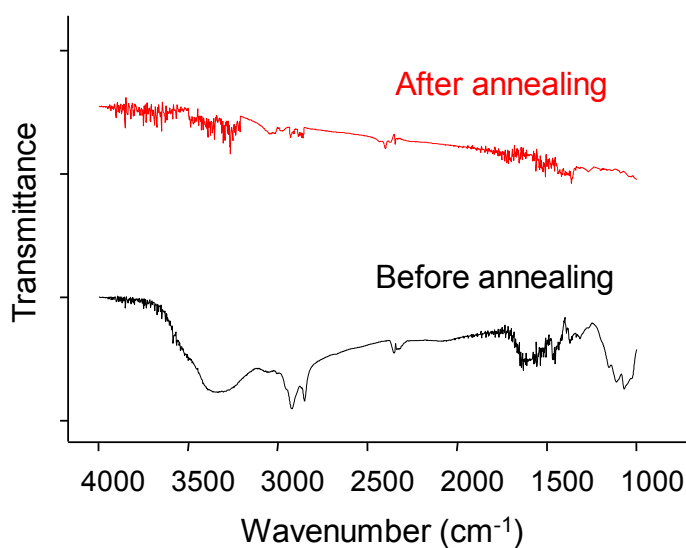

**Fig. S7.** FTIR spectra of AgInS<sub>2</sub>-Ag<sub>2</sub>S sample before and after annealing before STM measurement. The bands around 3200-3500 cm<sup>-1</sup> correspond to -NH<sub>2</sub> stretching, 2920 and 2852 cm<sup>-1</sup> correspond to methyl stretching and the bands around ~1330-1700 cm<sup>-1</sup> correspond to -NH<sub>2</sub> bending mode, all of which appears due to presence of oleylamine as a ligand on the surface on the heterostructures. On the other hand, after annealing, the intensity of all the

signals are markedly reduced which indicates that the surface ligands have been successfully depleted.

- 1 A. Narayanaswamy, H. Xu, N. Pradhan, M. Kim, X. Peng, *J. Am. Chem. Soc.* 2006, **128**, 10310-10319 .
- 2 D. Wang, T. Xie, Q. Peng, Y. Li, *J. Am. Chem. Soc.* 2008, **130**, 4016-4022.
- 3 P. D. C. King, T. D. Veal, F. Fuchs, C. Y. Wang, D. J. Payne, A. Bourlange, H. Zhang, G. R. Bell, V. Cimalla, O. Ambacher, R. G. Egdell, F. Bechstedt, C. F. McConville, *Phys. Rev. B* 2009, **79**, 205211/1-205211/10.
- 4 Q. Zhang, J. Xie, J. Yang, J. Y. Lee, *ACS Nano* 2008, **3**, 139-148.
- 5 (a) G. Zhu, Z. Xu, *J. Am. Chem. Soc.* 2011, **133**, 148-157; (b) J. Wang, K. Chen, M. Gong, B. Xu, Q. Yang, *Nano Lett.* 2013, **13**, 3996-4000
